# Supplementary material for: Organoid modeling of lung-resident immune responses to SARS-CoV-2 infection
Source: Research Square preprint supplement (doi:10.21203/rs.3.rs-2870695/v1), 2023-05-04
Supplement: Supplementary file 1 [file 26ff2c7a8935080411bc5db1.xlsx]

## Sheet: Sheet1
Antigen	Supplier	Product Number	Dilution
Ki-67	BD (Ms)	550609	1:50
EpCAM	Abcam (Rb)	ab223582	1:300
E-cadherin	BD (Ms)	610181	1:200
KRT5-Alexa488	Abcam	ab193894	1:200
SFTPC	ProteinTech (Rb)	10774-1-AP	1:200
SCGB1A1	R&D (Sh)	AF4218	1:300
Ac-Tubulin	Cell Signaling Tech (Rb)	5335S	1:200
HT1-56	Terrace Biotech (Ms)	TB-29AHT1-56	1:200
CD45	Cell Signaling Tech (Rb)	13917S	1:300
CD45	Novus (Rt)	NB100-77417	1:200
CD3	Dako (Rt)	ab11089	1:100
CD68	Dako (Ms)	GA613	1:100
CD68	Abcam (Rb)	EPR20545	1:200
Vimentin	Abcam (Ch)	ab24525	1:300
CD31	Abcam (Rb)	ab28364	1:200
ACE2	R&D (Gt)	AF933	1:100
SARS-CoV-2 Nucleocapsid Protein (NP)	Sino Biological (Ms)	40143-MM05	1:200
Cleaved Caspase-3	Abcam	9664S	1:400
Phalloidin-647	ThermoFisher	A30107	1:500
Donkey anti Rb 488	Jackson Immunoresearch	711-545-152	1:1000
Donkey anti Rb Cy3	Jackson Immunoresearch	711-165-152	1:1000
Donkey anti Rb 647	Jackson Immunoresearch	711-605-152	1:1000
Donkey anti Ms 488	Jackson Immunoresearch	715-545-150	1:1000
Donkey anti Ms Cy3	Jackson Immunoresearch	715-165-150	1:1000
Donkey anti Ms 647	Jackson Immunoresearch	715-605-151	1:1000
Donkey anti Rt 488	Jackson Immunoresearch	712-545-150	1:1000
Donkey anti Rt Cy3	Jackson Immunoresearch	712-165-153	1:1000
Donkey anti Rt 647	Jackson Immunoresearch	712-605-153	1:1000
Donkey anti Sh 488	Jackson Immunoresearch	713-545-003	1:1000
Donkey anti Sh Cy3	Jackson Immunoresearch	713-165-003	1:1000
