# Supplementary material for: Organoid modeling of lung-resident immune responses to SARS-CoV-2 infection
Source: Research Square preprint supplement (doi:10.21203/rs.3.rs-2870695/v1), 2023-05-04
Supplement: Supplementary file 2 [file 5f9af86e8e3841883c3ef46f.xlsx]

## Sheet: 3 days post-infection
image ID	#inf	KRT5	SFTPC	%inf KRT5+	%inf SFTPC+
1	14	0	4	0	28.57
2	27	0	5	0	18.52
3	23	0	10	0	43.48
4	3	0	3	0	100
5	36	0	7	0	19.44
6	15	0	13	0	86.67
7	8	0	8	0	100
8	15	0	3	0	20
9	12	0	1	0	8.33
10	1	0	1	0	100
11	53	0	33	0	62.26
12	44	0	32	0	72.73
13	33	0	27	0	81.82
14	6	0	4	0	66.67
15	17	0	8	0	47.06
			Total	0	57.04
image ID	#inf	SCGB	AcTub	%inf AcTUB+	%inf SCGB1A1+
1	62	1	3	1.61	4.84
2	13	0	0	0	0
3	19	0	3	0	15.79
4	17	0	0	0	0
5	10	0	1	0	10
6	5	0	0	0	0
7	25	0	3	0	12
8	71	1	7	1.41	9.86
9	8	0	3	0	37.5
10	87	0	38	0	43.68
11	27	0	4	0	14.81
12	19	0	4	0	21.05
13	13	0	3	0	23.08
14	18	0	2	0	11.11
15	146	6	19	4.11	13.01
			Total	0.48	14.45

## Sheet: 10 days post-infection
image ID	# inf	KRT5	SFTPC	% infected KRT5+	% infected SFTPC+
1	34	0	32	0	94.12
2	65	0	20	0	30.77
3	42	0	42	0	100
4	6	0	0	0	0
5	31	1	27	3.23	87.1
6	73	0	52	0	71.23
7	22	0	22	0	100
8	63	0	53	0	84.13
9	27	0	18	0	66.67
10	17	0	11	0	64.71
			Total	0.32	69.87
image ID	# inf	SCGB	AcTub	%inf SCGB1A1+	% infected AcTUB+
1	39	0	2	0	5.13
2	16	12	0	75	0
3	30	1	0	3.33	0
4	28	0	0	0	0
5	16	7	1	43.75	6.25
6	15	0	0	0	0
8	13	0	0	0	0
9	39	1	0	2.56	0
10	24	0	0	0	0
11	18	0	0	0	0
12	11	0	0	0	0
13	14	0	0	0	0
			Total	10.39	0.95
