# Supplementary material for: Organoid modeling of lung-resident immune responses to SARS-CoV-2 infection
Source: Research Square preprint supplement (doi:10.21203/rs.3.rs-2870695/v1), 2023-05-04
Supplement: Supplementary file 3 [file 6bed15c7eabe8afb2166eaf5.xlsx]

## Sheet: Sheet1
Gene	Forward primer (5'>3')	Reverse primer (5'>3')
TNFA	TCTTCTCGAACCCCGAGTGA	CCTCTGATGGCACCACCAG
IL6	GTAGCCGCCCCACACAGACAGCC	GCCATCTTTGGAAGGTTC
CD69	GATACGCAGGTAGAGAGGAA	GATACGCAGGTAGAGAGGAA
IL2	TCCTGTCTTGCATTGCACTAAG	TCCTGTCTTGCATTGCACTAAG
PCNA	CCTGCTGGGATATTAGCTCCA	CAGCGGTAGGTGTCGAAGC
IFNG	GGAAAGAGGAGAGTGACAGA	CATGTCTTCCTTGATGGTCTC
GAPDH	GAGTCAACGGATTTGGTCGT	GACAAGCTTCCCGTTCTCAG
MCSF	GGAGACCTCGTGCCAAATTA	TATCTCTGAAGCGCATGGTG
18S	GGCCCTGTAATTGGAATGAGTC	CCAAGATCCAACTACGAGCTT
TLR3	GTATTGCCTGGTTTGTTAATTGG	AAGAGTTCAAAGGGGGCACT
IFNA	GACTCCATCTTGGCTGTGA	TGATTTCTGCTCTGACAACCT
IFNB	CGCCGCATTGACCATCTA	GACATTAGCCAGGAGGTTCT
GZMB	CACTCACACACACTACAAGAG	CGCACAACTCAATGGTACT
IFNL2/3	GCCAAAGATGCCTTAGAAGAG	CAGAACCTTCAGCGTCAGG
