# Supplementary material for: Organoid modeling of lung-resident immune responses to SARS-CoV-2 infection
Source: Research Square preprint supplement (doi:10.21203/rs.3.rs-2870695/v1), 2023-05-04
Supplement: Supplementary file 4 [file b527e5f235dddf6f8ba79611.xlsx]

## Sheet: Sheet2
Supplementary Table 1
Study	Additional studies	Lung organoid donor #	Age	Gender	Clinical diagnosis	Anatomical location	Date acquired	Vaccination per medical record prior to experiment	Plasma received	MSD V-PLEX panel 1 IgA, IgG and IgM										MSD V-PLEX panel 1 IgG
										CoV2 NP IgA (cut-off > 5000 AU/mL)	CoV2 NP IgG (cut-off >5000 AU/mL)	CoV2 NP IgM (cut-off >5000 AU/mL)	CoV2 RBD IgA (cut-off >538 AU/mL)	CoV2 RBD IgG (cut-off >538 AU/mL)	CoV2 RBD IgM (cut-off >538 AU/mL)	CoV2 S IgA (cut-off >1960 AU/mL)	CoV2 S IgG (cut-off >1960 AU/mL)	CoV2 S IgM (cut-off >1960 AU/mL)	SARS-CoV-2 seropositive	COV-2 NP IgG (cut-off >8.8 BAU/mL)	COV-2 RBD IgG (cut-off >25.1 BAU/mL)	COV-2 S IgG (cut-off >5.3 BAU/mL)	SARS-CoV-2 seropositive
		30008	77 y	F	Metastatic melanoma	Left lingula	2022-07-21	Yes 3x	Yes	0.876924	29.8396	98.8374	133.362	15989.6	281.583	332.374	47727.1	195.925	Yes	ND	ND	ND	ND
		30010	73 y	F	Adenocarcinoma	Left upper lobe	2022-08-13	Yes 4x	Yes	15.5184	389.063	384.899	1901.23	89649.5	78.1033	1864.79	142955	37.459	Yes	0.7	2526.2	1390.6	Yes
		30012	83 y	M	Adenocarcinoma	Right lower lobe	2022-08-25	Yes 4x	Yes	35.1764	21.2934	18.3507	568.923	35752.5	36.3189	564.517	56562.4	21.3094	Yes	0.1	1459.6	727.2	Yes
		30022	70 y	F	Primary lung cancer with metastasis	Right	2022-09-20	Yes 3x	Yes	18.5944	142.265	158.073	1370.43	5568.04	26.6018	3648.7	17769	16.2767	Yes	0.6	369.6	229.5	Yes
		30023	75 y	M	Malignant neoplasm	Upper left lobe	2022-09-29	Yes 4x	Yes	20.0291	69.626	48.8377	3386.19	92892.1	252.72	4338.23	222141	207.974	Yes	0.2	4441.3	2569.6	Yes
Fig. 6ab AIM assay		30035	17 mo	M	Congenital lobar emphysema	Upper right lobe	2022-11-08	No	Yes	9.42821	8557.66	54.3968	13.1406	543.829	27.2498	25.2432	1351.05	20.2516	Yes	18.7	13.2	12.9	Yes
	Fig. 6bde spheromer	30006	17 y	M	Pneumothorax	Right upper lobe	2022-06-23	Yes 3x	No	ND	ND	ND	ND	ND	ND	ND	ND	ND	Positive infection history	ND	ND	ND	Positive infection history
		30014	79 y	M	Adenocarcinoma	Right upper lobe	2022-09-07	Yes 4x	Yes	306.193	1508.65	276.468	64.147	63.5019	139.931	83.6474	392.63	23.8479	No	5.4	2.5	6.6	Yes
		30015	66 y	F	Adenocarcinoma	Right middle lobe	2022-09-07	Yes 4x	Yes	333.445	7750.81	66.6633	7251.78	304003	186.127	9796.84	481569	595.518	Yes	18.1	9137.8	4663.7	Yes
		30026	74 y	M	Malignant neoplasm	Upper right lobe	2022-10-06	Yes 3x	Yes	99.5874	5103.98	42.4466	8203.74	119483	181.963	10137.4	191484	225.637	Yes	12.7	4621.9	2324.7	Yes
		30038	72 y	F	Adenocarcinoma	Lower left lobe	2022-11-16	Yes 5x	Yes	315.36	1837.63	435.943	7543.2	184670	127.112	12273.1	253053	127.215	Yes	ND	ND	ND	ND
		30036	7 mo	F	Congenital pulmonary airway malformation	Upper right lobe	2022-11-08	No	Yes	10.5842	32.7338	90.7315	0	72.7855	33.878	15.0949	176.87	19.193	No	0	2	1.3	No
			Positive value, above assay threshold							Seronegative donor information
