# Supplementary material for: Organoid modeling of lung-resident immune responses to SARS-CoV-2 infection
Source: Research Square preprint supplement (doi:10.21203/rs.3.rs-2870695/v1), 2023-05-04
Supplement: Supplementary file 5 [file ce2e7437e33880dfee9ebc23.xlsx]

## Sheet: Sheet1
Antigen	Clone	Supplier	Product Number
EPCAM	9C4	BioLegend	324214
CD45	HI30	BD Biosciences	563792
CD45	HI30	BioLegend	304006
CD68	ED1	Novus	NB600-985AF647
CD11c	3.9	BioLegend	301605
HLA-DR	L243	BioLegend	307610
CD3	OKT3	BioLegend	317343
CD3	SK7	BD Biosciences	612894
CD4	OKT4	BioLegend	317437
CD8a	RPA-T8	BioLegend	301009
CD19	HIB19	BioLegend	302217
CD56	HCD56	BioLegend	318317
CD69	FN50	BioLegend	310929
CD103	Ber-ACT8	BioLegend	350205
4-1BB	4B4-1	BioLegend	309817
CD25	BC96	BD Biosciences	567482
OX40	Ber-ACT35	BioLegend	350030
CD40L	24-31	BioLegend	310824
HLA-A2	BB7.2	BioLegend	343306
Zombie Aqua Dye	N/A	BioLegend	77144
LIVE/DEAD™ Fixable Near IR (780) Viability Kit	N/A	Thermofisher	L34992
